# Supplementary material for: Smooth muscle cell Piezo1 depletion results in impaired contractile properties in murine small bowel
Source: Springer Nature journal article supplement (doi:10.1038/s42003-025-07697-6), 2025-03-17
Supplement: MOESM1 [file 42003_2025_7697_MOESM1_ESM.pdf]

# Supplementary Figures

# Supplementary Figure 1: Inducible depletion of Piezo1 in SMCs.

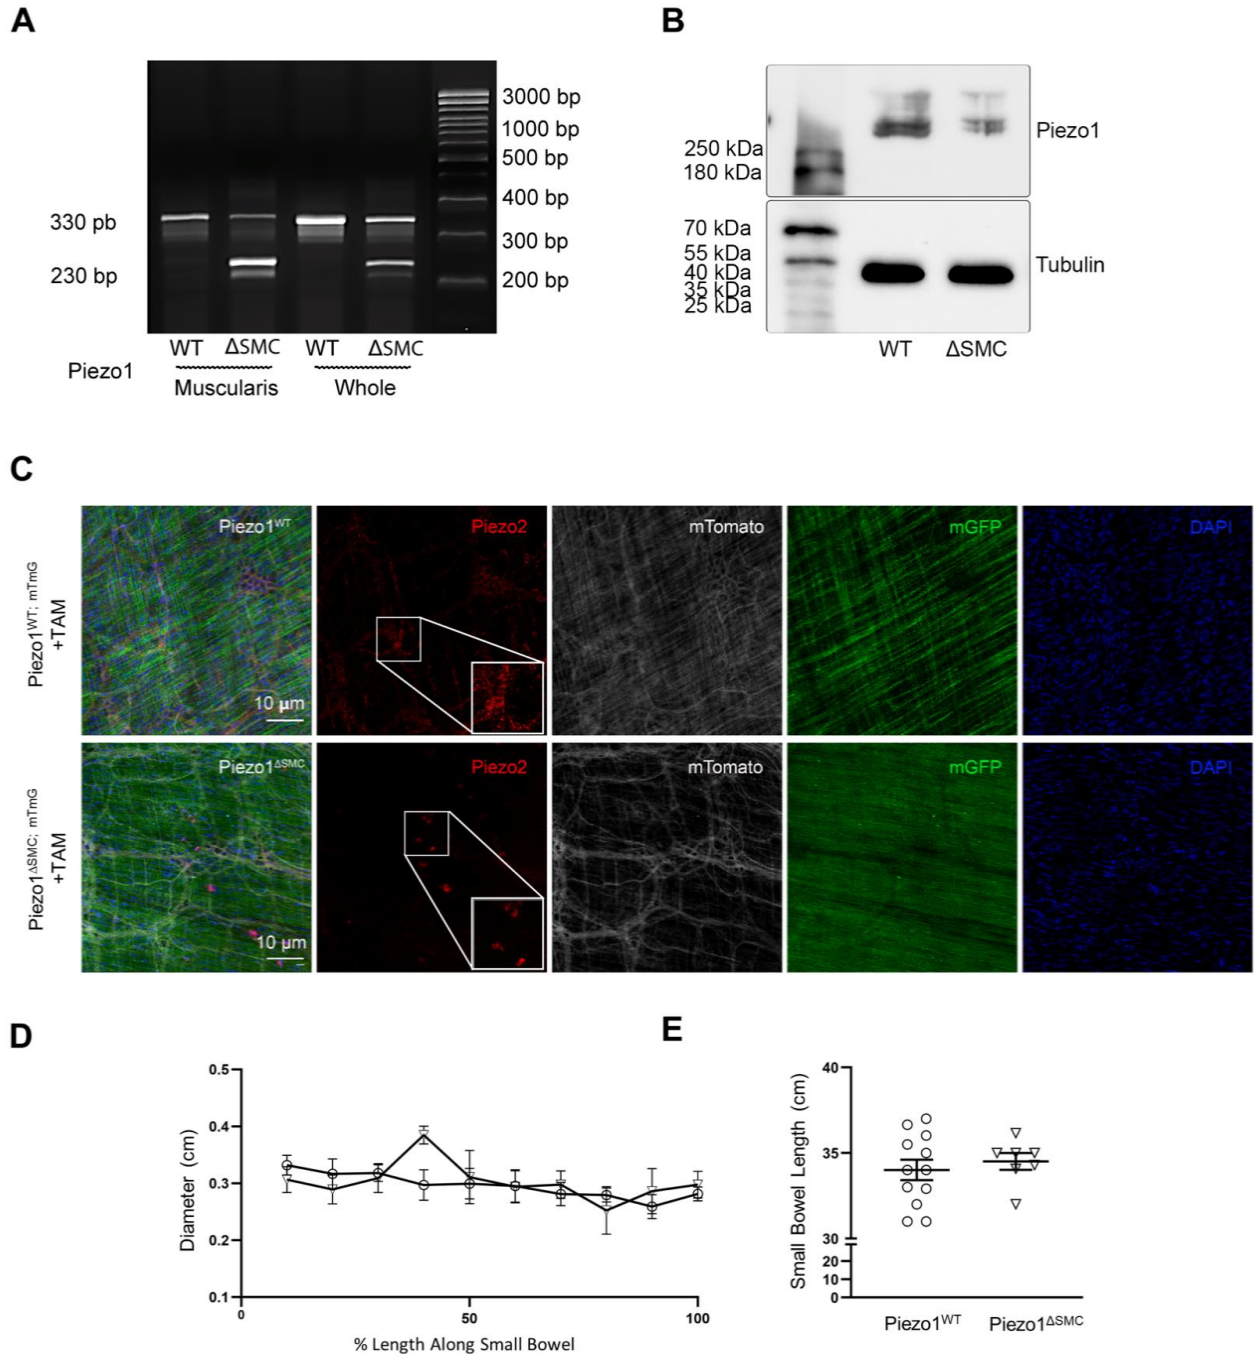

**(A)** *In vivo* samples from extracted muscularis or whole (all layers) of distal small bowel from Piezo1<sup>ΔSMC</sup> mice have proper cleavage by 10d post-Tam treatment compared to Piezo1<sup>WT</sup> mice as assessed by PCR of established genomic DNA<sup>26</sup>; **(B)** Muscularis samples were evaluated by Western Blot analysis using anti-Piezo1 (Proteintech) and b-Tubulin (Abcam), confirming a reduction of Piezo1 protein level in Piezo1<sup>ΔSMC</sup> compared to control mice. **(C)** Immunofluorescent imaging with an anti-Piezo2 antibody (Alamone Labs; red) in WM samples from Piezo1<sup>WT</sup>;mTmG and Piezo1<sup>ΔSMC</sup>;mTmG post-Tam treated mice reveals that Piezo2 is not located in SMC. All scale bars, 10  $\mu$ m. **(D)** Gross measurements of diameter measurements throughout the entire length of the small bowel divided into 10 portions of 6- to 8-week-old Piezo1<sup>WT</sup> and Piezo1<sup>ΔSMC</sup> mice at 10d post-Tam. **(E)** Small bowel length from the most proximal portion of the duodenum to the terminal ileum immediately before the cecum of Piezo1<sup>WT</sup> and Piezo1<sup>ΔSMC</sup> in 6-to 8-week-old mice at 10d post-Tam.

## Supplementary Figure 2: Verification of Myh11-Cre-induced cleavage of pup IMC in an *in vitro* co-culture system and human IMCs derived from the fetal small intestine.

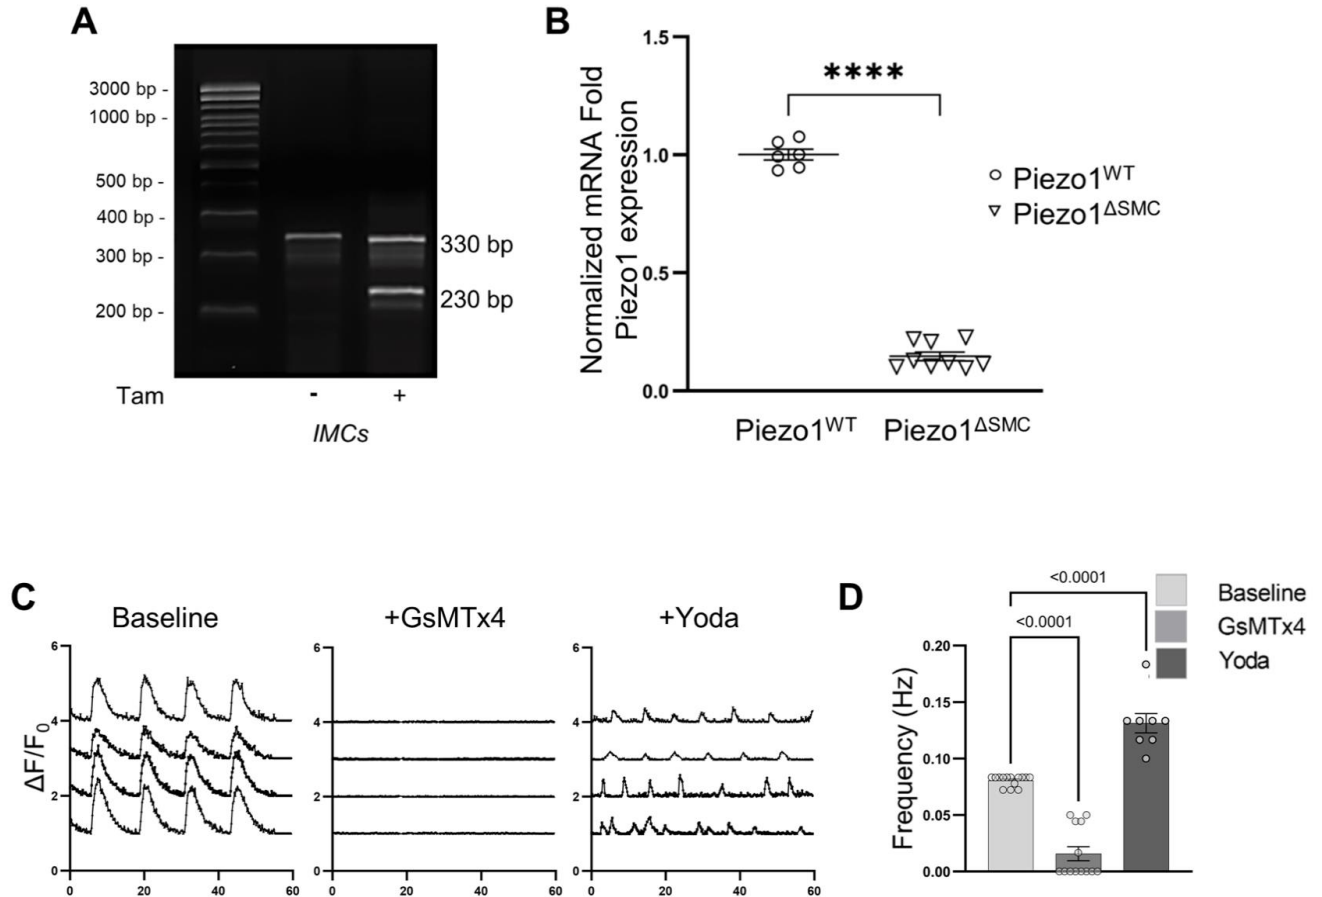

**(A/B)** *In vitro* confirmation of muscularis sample knockout efficiency as determined by PCR and qPCR of appropriate cleavage<sup>30</sup> of floxed Piezo1<sup>ΔSMC</sup> treated with 4-OHT or vehicle control of 7–10-day-old Piezo1<sup>ΔSMC</sup> samples. The qPCR results were calculated using the  $\Delta\Delta CT$  method relative to Gapdh expression. **(C)** Representative GCaMP6f Ca<sup>2+</sup> tracings of human IMCs extracted from fetal intestinal muscularis samples (17 weeks gestational age) subjected to GsMTx4 (20 $\mu$ M) and Yoda1 (5 $\mu$ M), with **(D)** frequency differences ( $n > 3$  measurements/sample,  $n > 5$  biological specimens per group). One-way ANOVA with Dunnett's correction was performed to compare it to the baseline. Data displayed as mean  $\pm$  SEM. p-value displayed above comparisons, with significance marked as  $p < 0.05$ .

### Supplementary Figure 3: Quantification of SMCs by layer.

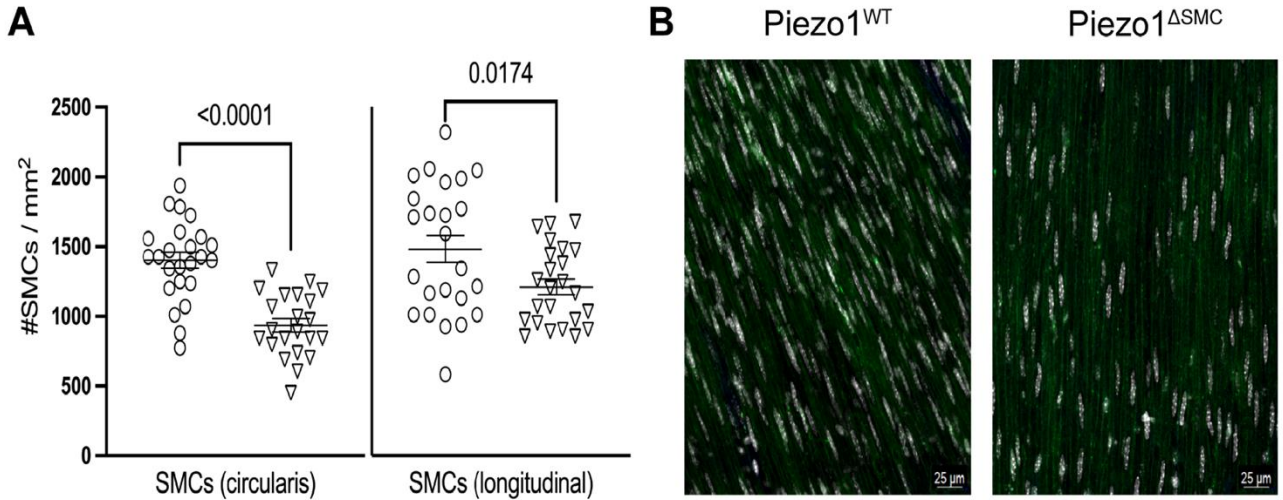

(A) The SMC density (SMCs per mm<sup>2</sup>) in separate layers (circular and longitudinal) using distal small bowel segments taken from 7-9 week-old mice (following Tam administration at 4-6 weeks old) with all assessments performed age-matched in both groups. (B) Representative WM preparations of distal small bowel of Piezo1<sup>WT</sup> (left) and Piezo1<sup>ΔSMC</sup> (right) mice at post-Tam treatment showing SMCs (pseudo-white). Scale bars are 25 μm.



# Supplementary Figure 4: Whole-mount imaging of cellular components of the muscularis.

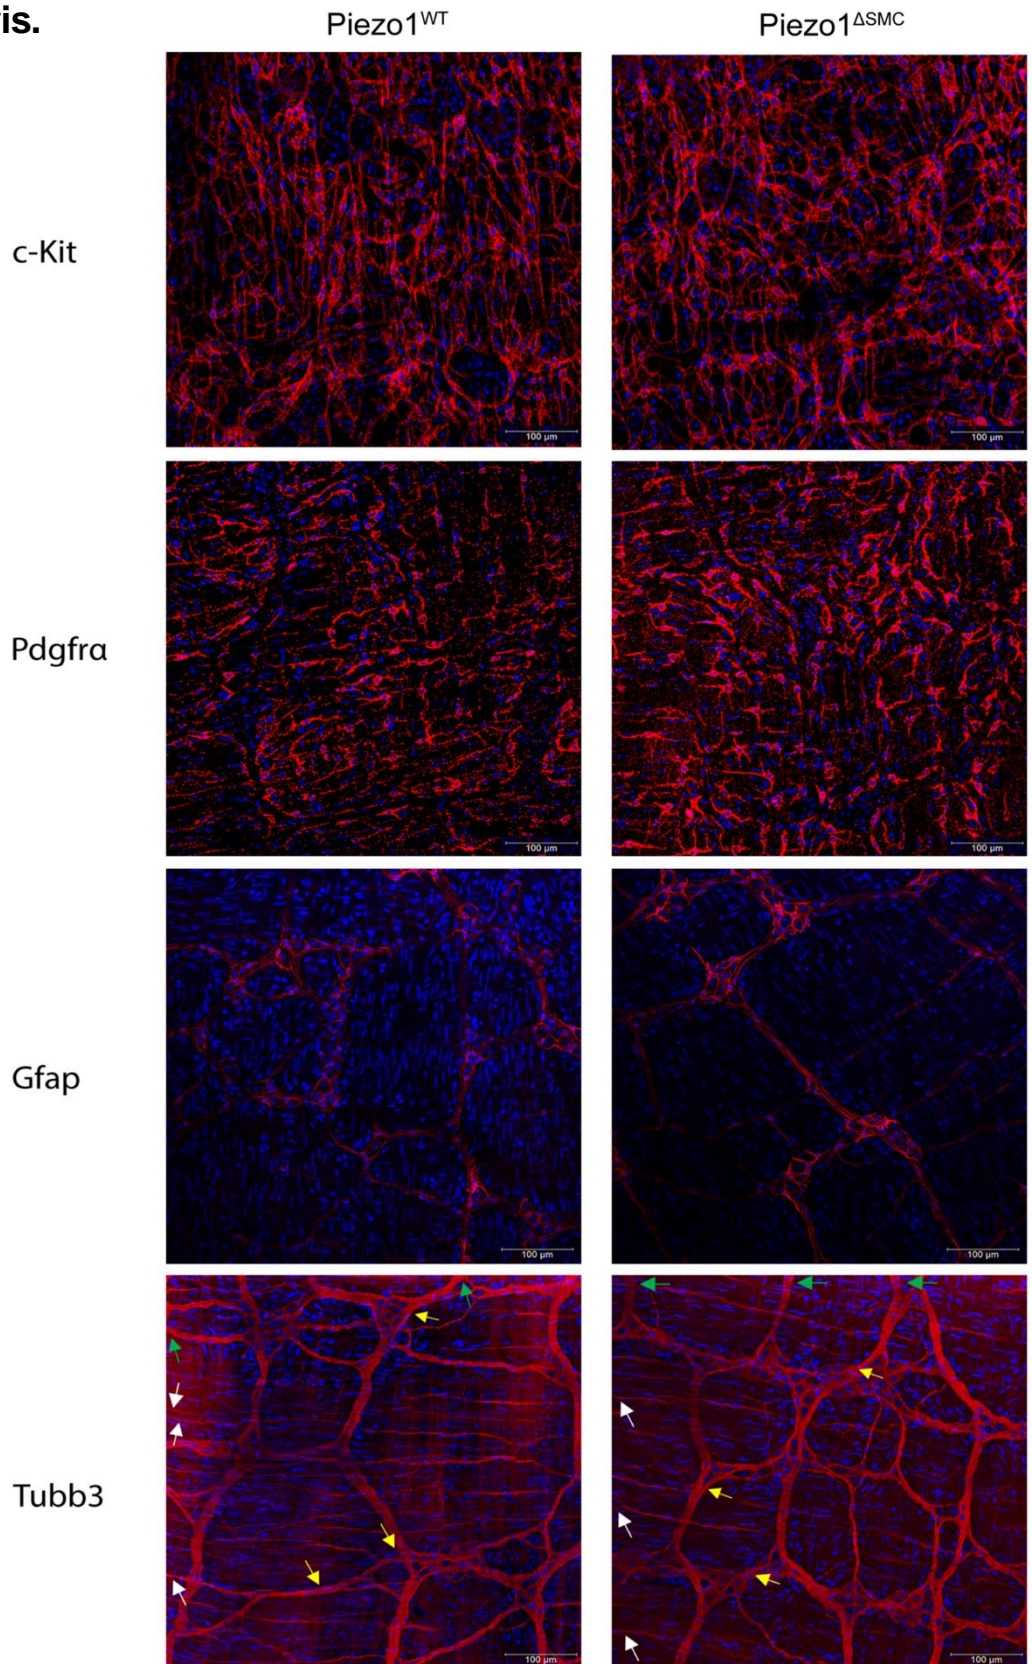

WM longitudinal samples of distal small bowel of Piezo1<sup>WT</sup> (left) and Piezo1<sup>ΔSMC</sup> (right) mice at 21 days post-Tam treatment (7-9 weeks) stained with DAPI, anti-c-Kit (ICC), Pdgfra (Pdgfra+), Gfap (Glial cells), and Tubb3 (neuronal cells, bundles, and fibers) antibodies. Tubb3 staining includes arrows to differentiate neuronal bundles (green), fibers (pseudo-white), and cells (yellow). Scale bars are 100μm.

# Supplementary Figure 5: . SMC-specific deletion of Piezo1 alters related Ca<sup>2+</sup> ion channel expression within the muscularis.

**A**

|        | $\Delta$ Ct          |                        |
|--------|----------------------|------------------------|
| Gene   | Piezo1 <sup>WT</sup> | Piezo1 <sup>ΔSMC</sup> |
| Ano1   | 14.332482            | 10.570477              |
| Orai1  | 11.445477            | 14.527725              |
| Orai3  | 10.164353            | 11.331921              |
| Trpc4  | 18.452350            | 19.796135              |
| Cav1.2 | 14.263201            | 13.088020              |

**B**

Ano1

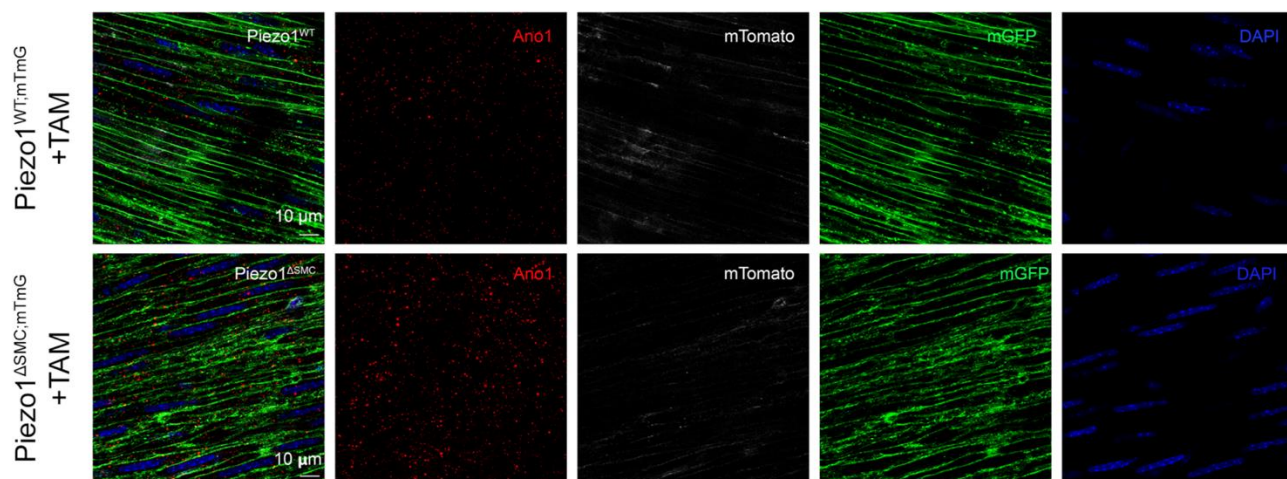

**C**

Orai1

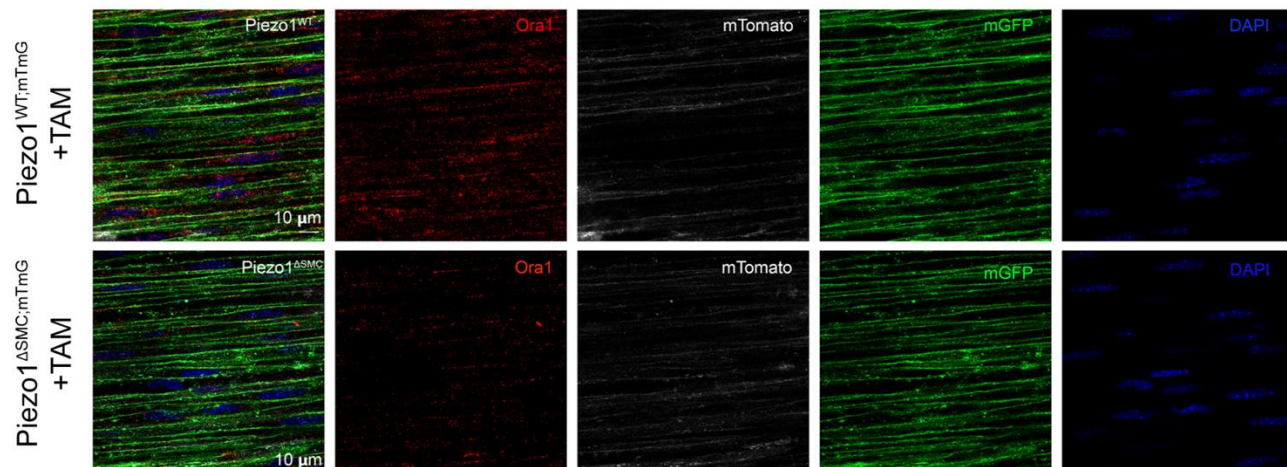

Distal small bowel samples were isolated from 4- to 6-week-old Piezo1<sup>WT</sup>;mTmG and Piezo1<sup>ΔSMC</sup>;mTmG mice 21d post-Tam were (A) quantified for relative expression of related ion channels via qPCR ( $\Delta$ CT values) shown for final graph in **Fig.5A**; with confocal imaging of (B) Ano1 and (C) Orai 1. Green shows the membrane-GFP; pseudo-white is the membrane-Tdtomato from the mTmG reporter. All antibodies were obtained from Alamone Labs using WM preparations. Scale bars 10μm.



## Supplementary Figure 6: SMC-specific deletion of Piezo1 alters related $\text{Ca}^{2+}$ ion channel expression within the muscularis.

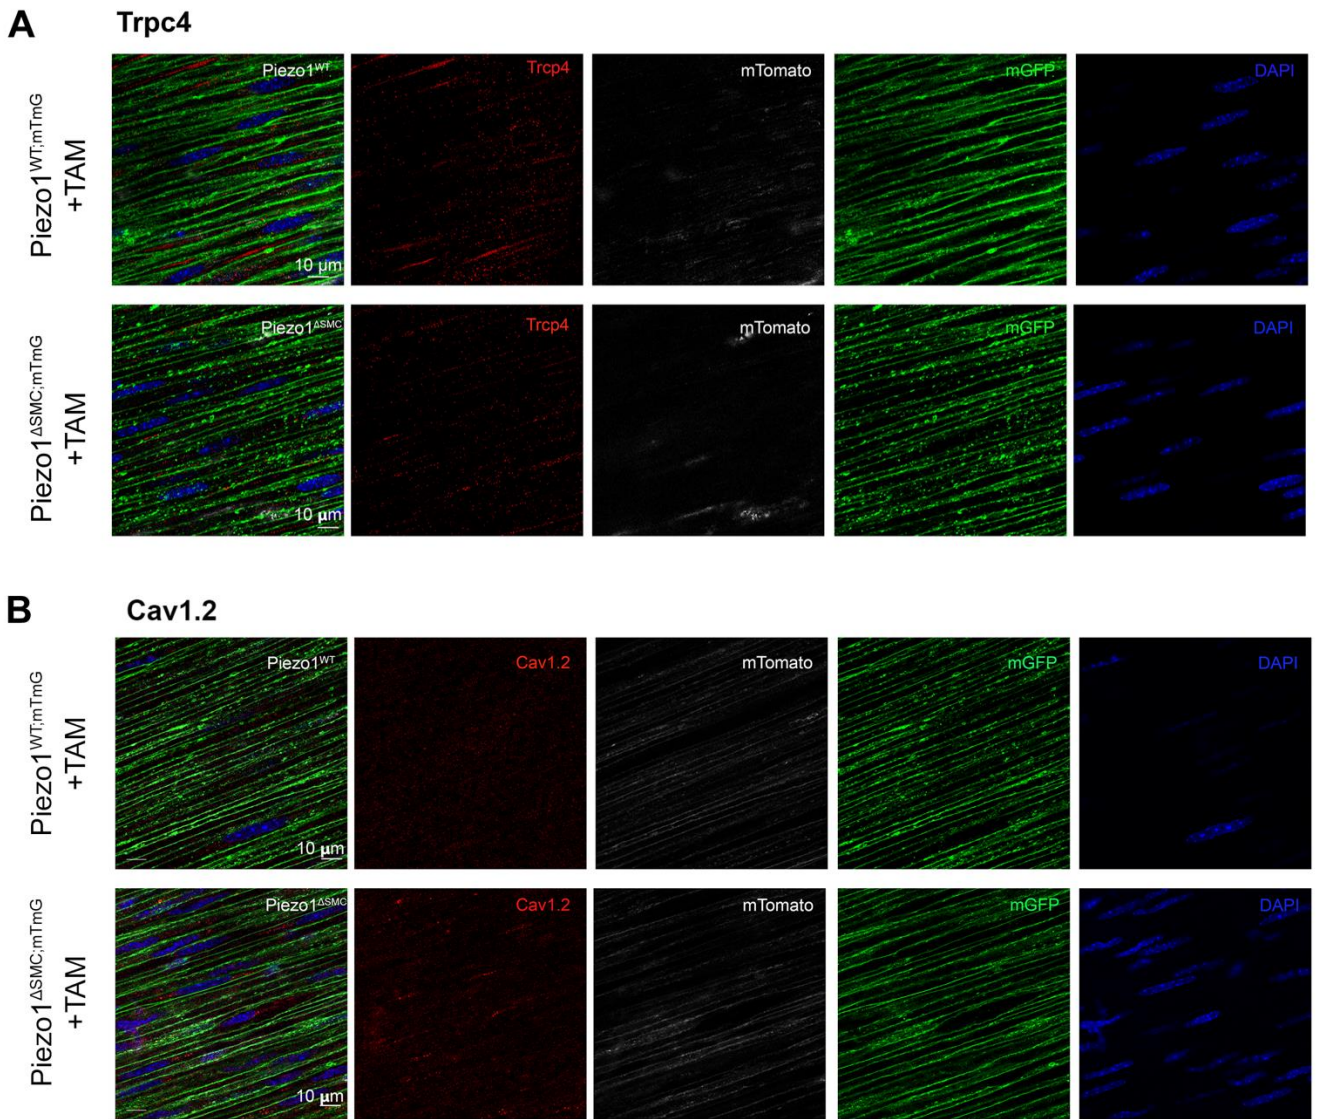

Distal small bowel samples were isolated from Piezo1<sup>WT</sup>;mTmG (upper) and Piezo1<sup>ΔSMC</sup>;mTmG (lower) mice 21d post-Tam (7-9 weeks) were imaged with Leica Confocal microscope to assess IF staining of related ion channels. Green shows the membrane-GFP; pseudo-white is the membrane-Tdtomato from the mTmG reporter. Antibodies shown are **(A)** Trpc4 and **(B)** Cav1.2 with pseudo-red (Alamone) using WM preparations. Scale bars 10μm.

Supplementary Figure 7: Colocalization of Piezo1 with RyR and IP3R.

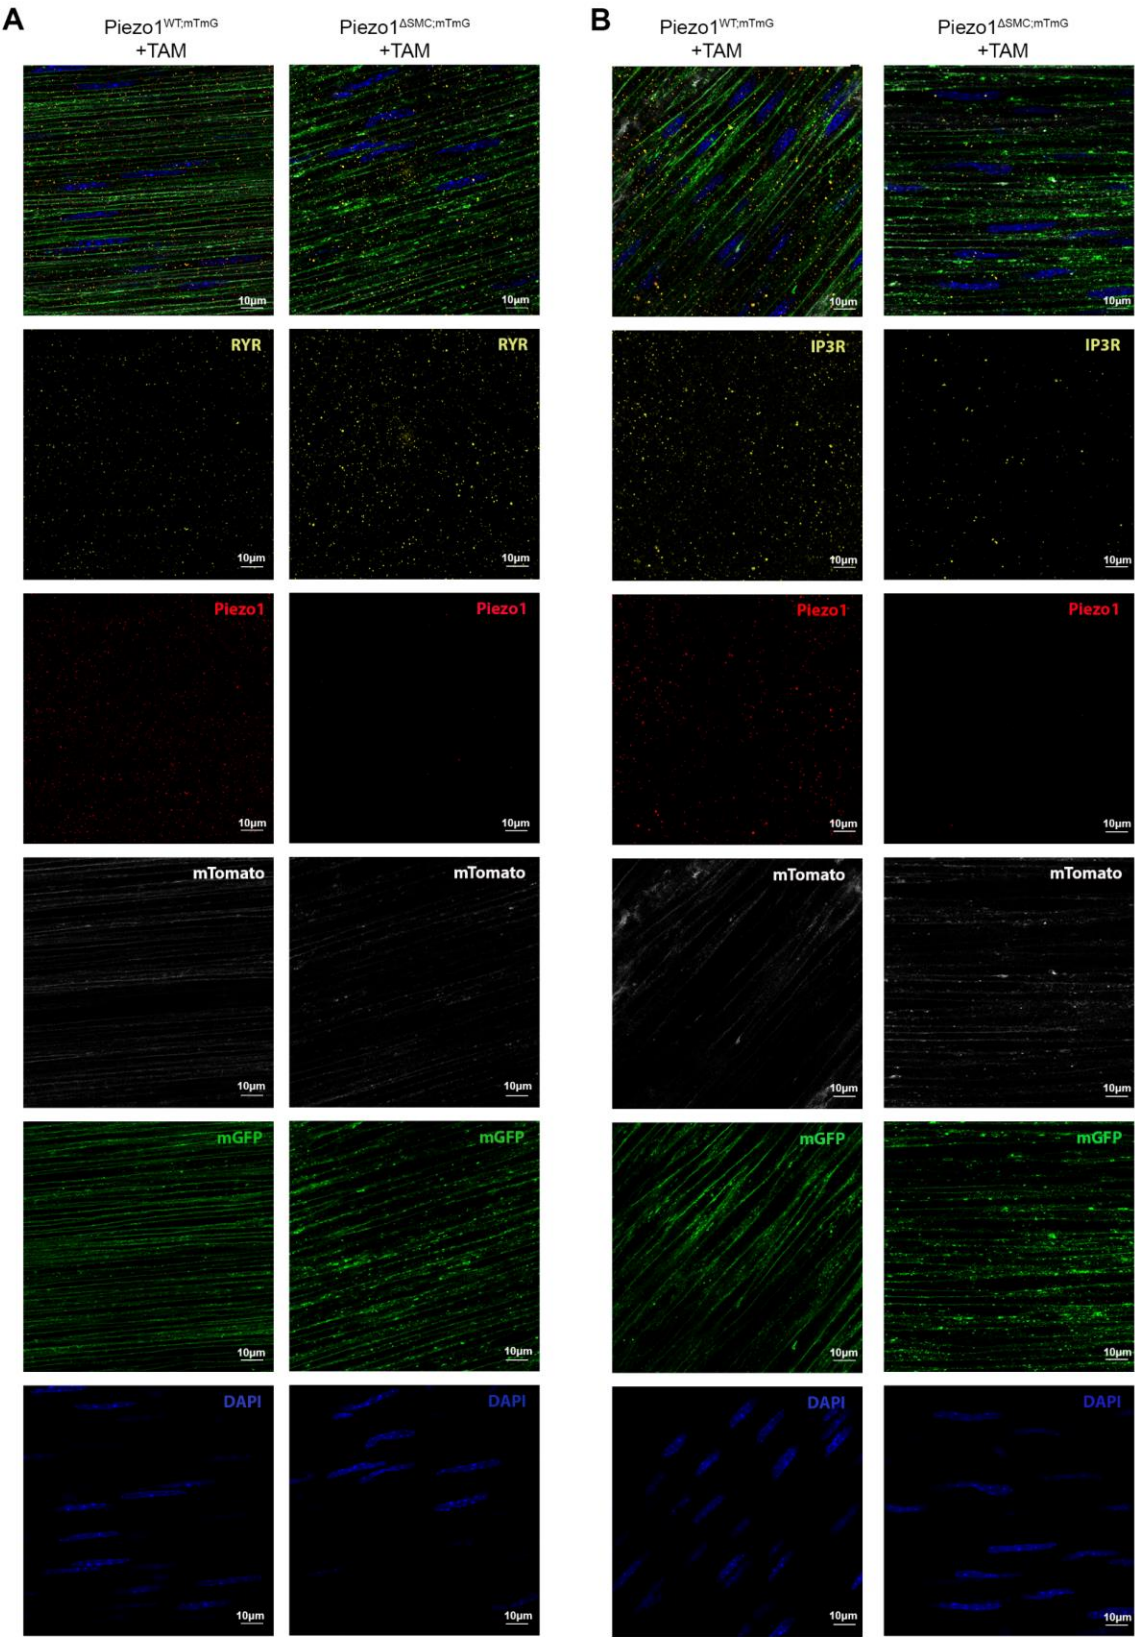

Leica Confocal SP8-STED microscope generated single-channel images of muscularis in **(A)** Figure 9A of anti-RyR (pseudo-yellow) and Piezo1 (pseudo-red), and green and pseudo-white from mTmG reporter from Piezo1<sup>WT;mTmG</sup> and Piezo1<sup>ΔSMC;mTmG</sup> mice. **(B)** Figure 9B of anti-IP3R (pseudo-yellow) and Piezo1 (pseudo-red), and green and pseudo-white from mTmG reporter from Piezo1<sup>WT;mTmG</sup> and Piezo1<sup>ΔSMC;mTmG</sup> mice. Scale bars 10μm.



Supplementary Figure 8: Nested analysis of RyR and IP3R positive clusters.

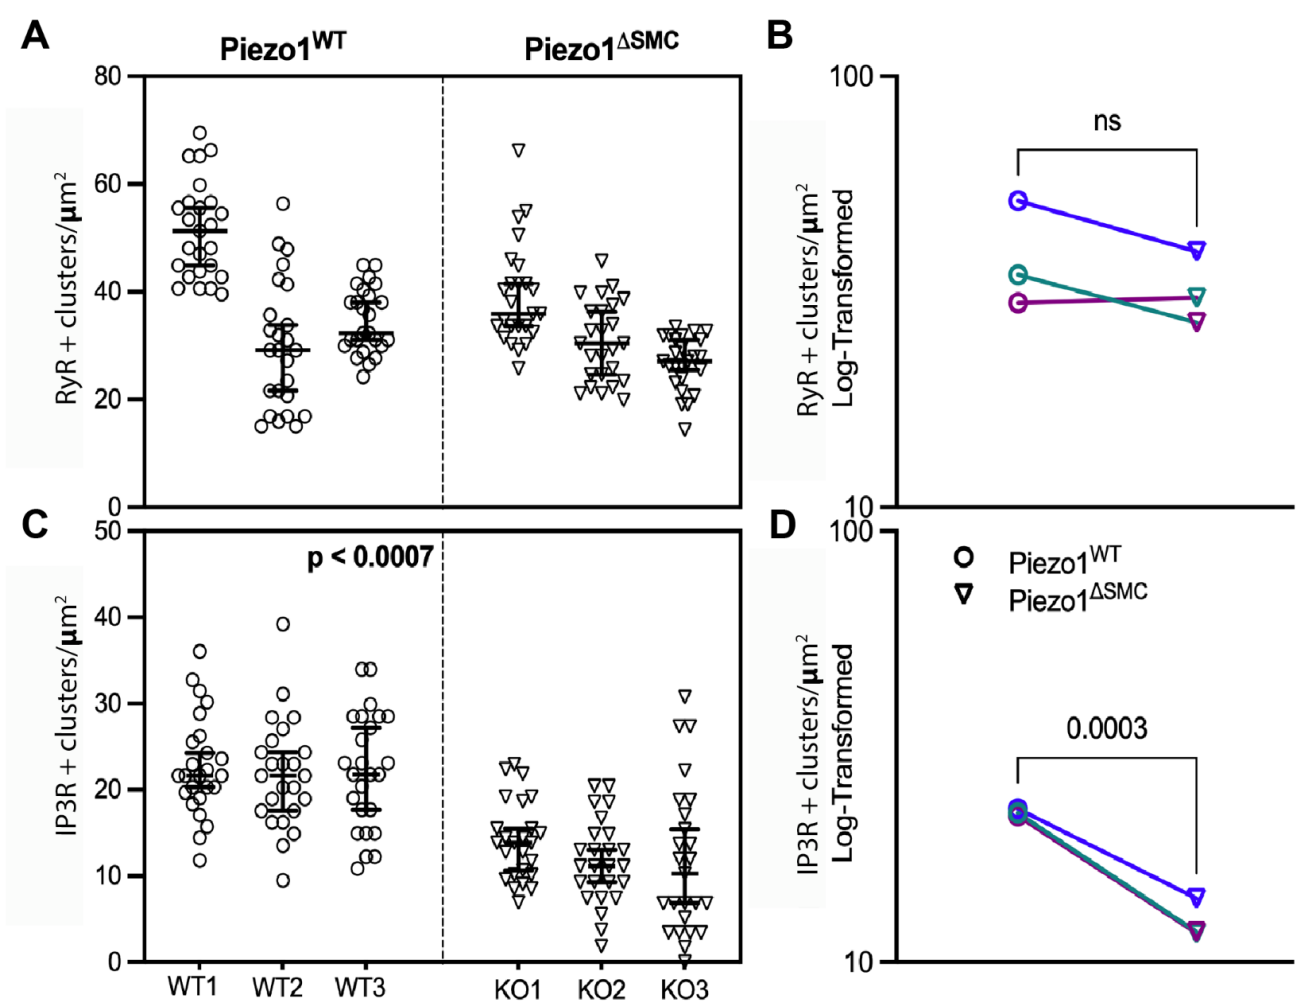

(A/C) To assess the impact of loss of Piezo1 on cells expressing RyR+(top) or IP3R+(bottom) signals or clusters, a nested t-test was conducted with each mouse designated as WT1,2,3 (wildtype) or KO1,2,3 (knockout). Total counts of specific protein clusters were obtained using using AIVIA software Pixel Classifier and Smart Segmentation tools to segment structures, distinguish them from the background, and generate 2D outlines. Total counts were then normalized by ROI area relative to sample proportion to account for batch and animal differences (n>25 ROIs per mouse, N=3 mice per group). (B/D) Log-transformed averages from each mouse displayed to illustrate directionality of general changes observed.

**Supplementary Movie: Whole-mount imaging of the external muscularis.** WM longitudinal sample of distal small bowel of Piezo1<sup>WT;mTmG</sup> a mouse treated with Tam. Leica Confocal SP8-STED microscope generated single-channel images. The z-stack movie between each image was 0.4um and goes from the longitudinal layer, which is membrane-associated GFP fluorescence (pseudo-green) positive and indicates Cre-activation. The adjacent myenteric plexus is membrane-associated, revealing Tdtomato fluorescence signals in most cells. The circular muscularis layer appears perpendicular to the longitudinal layer at a deeper level. Beyond the circular level are Tdtomato fluorescence cells in an irregular circular structure surrounding epithelial crypts that are not apparent.

# Supplementary Tables



| Supplementary Table 1: Antibodies |                   |        |                         |             |             |
|-----------------------------------|-------------------|--------|-------------------------|-------------|-------------|
| Antigen Target                    | Company           |        | Catalog #, RRID         | Dilution    | Application |
| Alexa Fluor Goat anti Rabbit 647  | Thermo Scientific | Fisher | A21246, AB_2535814      | 1:200       | FFPE; WM    |
| Alexa Fluor Donkey anti Mouse 647 | Thermo Scientific | Fisher | A-31571, AB_162542      | 1:200       | WM          |
| Alexa Fluor Donkey anti Mouse 488 | Thermo Scientific | Fisher | A21202, AB_141607       | 1:200       | FFPE; WM    |
| DyLight Goat anti Guinea Pig 800  | Thermo Scientific | Fisher | SA5-10100, AB_2556680   | 1:200       | WM          |
| Alexa Fluor Goat anti Mouse 790   | Thermo Scientific | Fisher | A11375, AB_2534146      | 1:200       | WM          |
| $\beta$ -III Tubulin              | Abcam             |        | Ab78078, AB_2256751     | 1:500       | WM          |
| $\beta$ -actin                    | BD Biosciences    |        | 612657, AB_399901       | 1:200       | FFPE        |
| CC3                               | Cell Signaling    |        | 9661S, AB_2341188       | 1:50; 1:400 | FFPE; WM    |
| c-Kit/CD117                       | R&D Systems       |        | AF1356, AB_354750       | 1:100       | WM          |
| Pdgfra (D13C6)                    | Cell Signaling    |        | 5241, AB_10692773       | 1:1000      | WM          |
| Gfap                              | Abcam             |        | ab7260, AB_305808       | 1:1000      | WM          |
| Piezo1                            | Alomone Labs      |        | APC-087, AB_2756743     | 1:500       | FF; WM      |
| Piezo1                            | Proteintech       |        | 15939-1-AP, AB_2231460  | 1:1000      | WB          |
| Piezo2                            | Alomone Labs      |        | APC-090, AB_2876842     | 1:100       | WM          |
| $\beta$ -Tubulin                  | DSHB              |        | E7, AB_528499           | 1:1000      | WB          |
| Cav1.2                            | Alomone Labs      |        | ACC-003-GP, AB_11219156 | 1:500       | WM          |
| Orai1                             | Alomone Labs      |        | ACC-062, AB_10918021    | 1:500       | WM          |
| Ano1                              | Alomone Labs      |        | ACL-011, AB_10920576    | 1:200       | WM          |
| Trpc4                             | Alomone Labs      |        | ACC-119, AB_234091      | 1:250       | WM          |
| RyR (F-1)                         | Santa Cruz        |        | sc-376507, AB_11149759  | 1:100       | WM          |
| IP3R-3                            | BD Bioscience     |        | 610312, AB_397704       | 1:500       | WM          |

| Supplementary Table 2: Oligonucleotides |          |                                                                                                                                                                 |
|-----------------------------------------|----------|-----------------------------------------------------------------------------------------------------------------------------------------------------------------|
| Common Name                             | PCR/qPCR | Reference/Thermo Fisher Taqman #                                                                                                                                |
| Piezo1                                  | PCR      | <b>P1 F:</b> CTTGACCTGTCCCCTTCCCCATCAAG;<br><b>P1 WT/fl R:</b><br>CAGTCACTGCTCTTAACCATTGAGCCATCTC;<br><b>P1 KO R:</b> AGGTTGCAGGGTGGCATGGCTCTTTTT <sup>30</sup> |
| Piezo1                                  | qPCR     | Assay ID: <a href="#">Mm01241549_m1</a>                                                                                                                         |
| Piezo2                                  | qPCR     | Assay ID: Mm01265861_m1                                                                                                                                         |
| Atoh1                                   | qPCR     | Assay ID: Mm00476035_s1                                                                                                                                         |
| Ano1                                    | qPCR     | Assay ID: Mm00724407_m1                                                                                                                                         |
| Trpc4                                   | qPCR     | Assay ID: Mm00444280_m1                                                                                                                                         |
| Orai1                                   | qPCR     | Assay ID: Mm00774349_m1                                                                                                                                         |
| Orai3                                   | qPCR     | Assay ID: Mm01612888_m1                                                                                                                                         |
| Cav1.2                                  | qPCR     | Assay ID: Mm01188822_m1                                                                                                                                         |
| Gapdh                                   | qPCR     | Assay ID: Mm99999915_g1                                                                                                                                         |

| Supplementary Table 3: Lentivirus |                                                       |                            |
|-----------------------------------|-------------------------------------------------------|----------------------------|
| Common Name                       | Formal Name                                           | Order Stock #              |
| gCAMP6f                           | Phage-RSV-gCAMP6f                                     | Addgene #80315             |
| mCherry                           | pLV-mcherry                                           | Addgene # 36084            |
| Scramble shRNA                    | TRIPZ Inducible Lentiviral shRNA Nonsilencing Control | Thermo Scientific #RHS4743 |

| Supplementary Table 4: Murine lines |                                                       |                 |             |
|-------------------------------------|-------------------------------------------------------|-----------------|-------------|
| Common Name                         | Formal Name                                           | RRID#           | JAX Stock # |
| Myh11-ERT2/Cre-                     | B6.FVB-Tg(Myh11-icre/ERT2)1Soff/J                     | IMSR_JAX:019079 | #019079     |
| Piezo1 <sup>fl/fl</sup>             | B6.Cg-Piezo1 <sup>tm2.1Apa</sup> /J                   | IMSR_JAX:029213 | #029213     |
| mTmG                                | B6.129(Cg)-Gt(ROSA)26Sortm4(ACTB-tdTomato,-EGFP)Luo/J | IMSR_JAX:007676 | #007676     |

| Supplementary Table 5: Drugs |                                         |               |                    |           |
|------------------------------|-----------------------------------------|---------------|--------------------|-----------|
| Modulator                    | Target Gene                             | Concentration | Company            | Catalog # |
| <b>Yoda</b>                  | Piezo-1 Activator                       | 5μM           | Tocris             | 558638    |
| <b>GSMTx4</b>                | Piezo-1, Trpc Inhibitor                 | 20μM; 1μM     | MedChemExpress USA | HY-P1410A |
| <b>Verapamil</b>             | L-type Ca Channel Blocker               | 10μM          | Cytoskeleton       | CY-SCV01  |
| <b>Carbachol</b>             | M3 agonist                              | 10μM; 1μM     | Sigma              | 51-83-2   |
| <b>Nicardipine</b>           | Ca Channel Blocker                      | 10μM          | Sigma              | 4527-84-3 |
| <b>5-HT</b>                  | Serotonin activator                     | 10μM          | Sigma              | 50-67-9   |
| <b>TTX</b>                   | Inhibits voltage-gated sodium channels  | 1μM           | TOCRIS             | 1069      |
| <b>ODQ</b>                   | Guanylyl cyclase Nitric oxide inhibitor | 10μM          | Cayman Chemical    | 81410     |
| <b>L-NNA</b>                 | Nitric oxide synthase (NOS) inhibitor   | 100μM         | Cayman Chemical    | 80220     |
